# Supplementary material for: Two years online measurement of fine particulate nitrate in westernYangtze River Delta: Influences of thermodynamics and N 2 O 5 hydrolysis
Source: Copernicus journal article supplement (doi:10.5194/acp-2018-608), 2018-07-02
Supplement: Supplementary file 1 [file acp-2018-608-supplement.pdf]

# Support Information

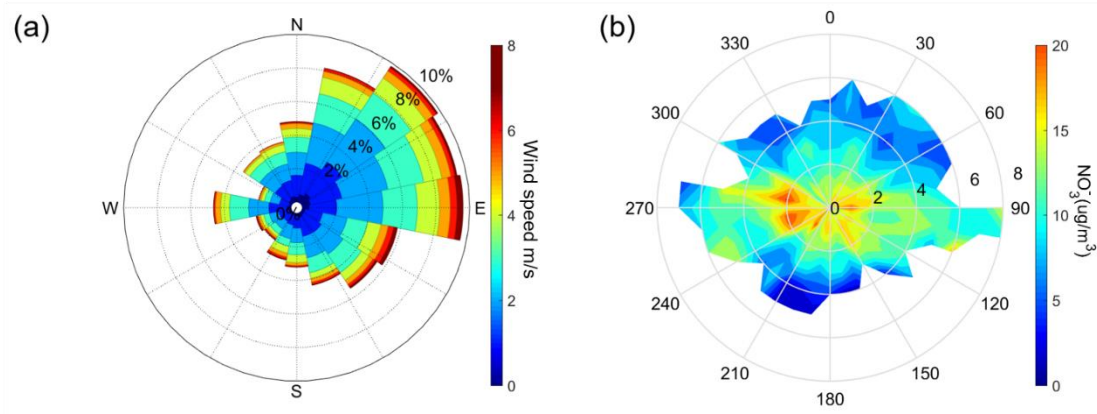

**Figure S1** (a) Wind rose plot, color-coded by wind speed (m/s). (b) Wind rose plot, color-coded by the median nitrate mass concentrations at corresponding wind speed and wind direction.

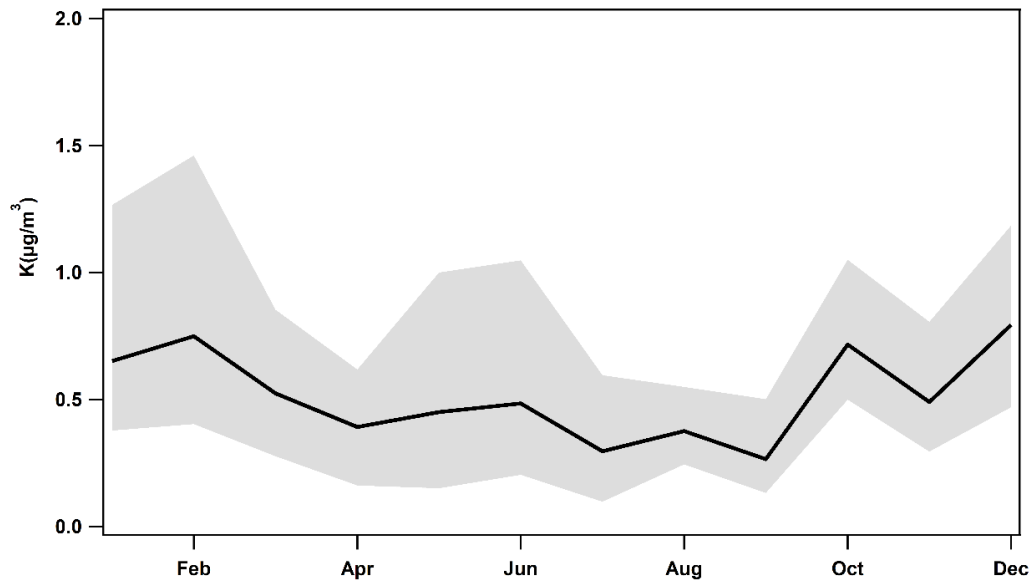

**Figure S2** Monthly variation of potassium. Bold solid lines are the median values and thin solid lines represent percentiles of 75% and 25%.

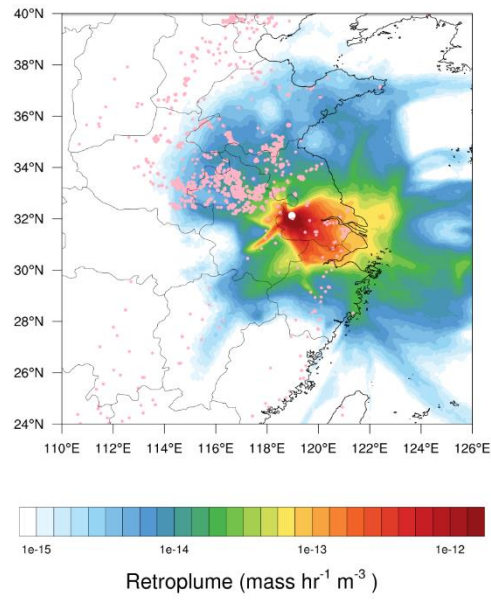

**Figure S3** The averaged retroplumes (i.e., 100 m footprint) for the Top 25% nitrate concentrations in summer 2014 together with the fire spots during the same time. Pink points indicate the fire spots.

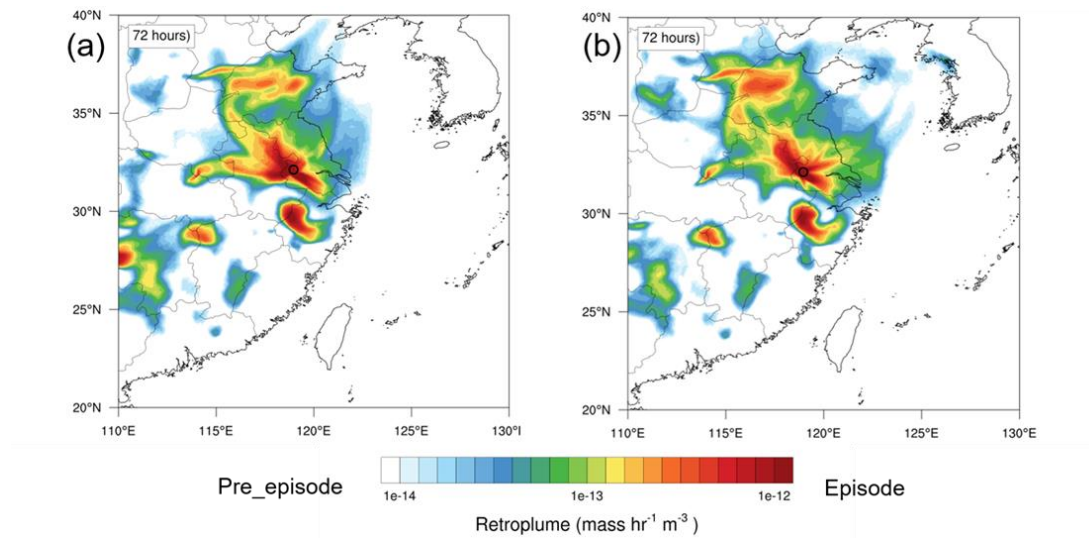

**Figure S4** Averaged retroplume of air masses at Nanjing for the period of **(a)** pre-episode days and **(b)** episode days of nitrate pollution.
